# Supplementary material for: Barcoding bias in high-throughput multiplex sequencing of miRNA
Source: HighWire-hosted journal article supplement (doi:10.1101/gr.121715.111), 2011-07-12

# **Bar-coding bias in high-throughput multiplex sequencing of miRNA**

Shahar Alon<sup>1,\*</sup>, Francois Vigneault<sup>2,3,4\*</sup>, Seda Eminaga<sup>2</sup>, Danos C. Christodoulou<sup>2</sup>, J.G. Seidman<sup>2</sup>, George M Church<sup>2,3</sup> and Eli Eisenberg<sup>5</sup>

1 Department of Neurobiology, George S. Wise Faculty of Life Sciences, Tel-Aviv University, Israel

2 Department of Genetics, Harvard Medical School, Boston, MA 02115, USA

3 Wyss Institute for Biologically Inspired Engineering, Boston, MA 02115, USA

4 Ragon Institute of MGH, MIT and Harvard, Massachusetts, MA 02129, USA

5 Raymond and Beverly Sackler School of Physics and Astronomy, Tel-Aviv University, Israel

\* These authors contributed equally to this work.

Correspondence should be addressed to: Eli Eisenberg, [elieis@post.tau.ac.il](mailto:elieis@post.tau.ac.il)

## **SUPPLEMENTARY TABLES AND FIGURES**

## Supplementary Tables

**Table S1.** The number of reads after each filtering step for all the sequencing runs performed.

|                                                                                                                                                                 | Mouse normal hearts using Ligation-based protocol | Mouse diseased hearts using Ligation-based protocol | Human brain using PCR-based protocol | Mouse heart libraries using PCR-based protocol |
|-----------------------------------------------------------------------------------------------------------------------------------------------------------------|---------------------------------------------------|-----------------------------------------------------|--------------------------------------|------------------------------------------------|
| Minimum Hamming distance between bar-codes used                                                                                                                 | 2                                                 | 2                                                   | 3                                    | 3                                              |
| Total number of reads                                                                                                                                           | 17,738,028                                        | 20,237,297                                          | 10,561,029                           | 23,266,377                                     |
| Reads filtered as they didn't have full (perfect) bar-code sequence. In brackets the number of reads that would have been filtered if one mismatch was allowed. | 3,566,055 (3,007,116*)                            | 4,524,554 (3,847,623*)                              | 2,078,569 (1,304,873)                | 3,948,153 (3,452,339)                          |
| Low quality reads filtered                                                                                                                                      | 4,200,531                                         | 5,875,118                                           | 114,680                              | 1,730,425                                      |
| Reads filtered as they were too short for mature miRNA (<15 bases)                                                                                              | 1,738,139                                         | 1,934,818                                           | 1,114,522                            | 468,619                                        |
| Reads filtered as they were too long for mature miRNA (>28 bases)                                                                                               | 35,694                                            | 38,578                                              | 2,009,661                            | 204,524                                        |
| Total number of reads after filtering                                                                                                                           | 8,197,609                                         | 7,864,229                                           | 5,243,597                            | 16,914,656                                     |
| Number of filtered reads aligned against known pre-miRNA with up to two mismatches                                                                              | 5,077,357                                         | 5,042,301                                           | 1,246,440                            | 7,582,091                                      |
| Number of filtered reads aligned against known pre-miRNA with up to one mismatch                                                                                | 4,906,950                                         | 4,881,179                                           | 1,202,408                            | 7,462,349                                      |

\* - reads with sequence that can be attributed to two different bar-codes (when allowing one mismatch) have been filtered.

**Table S2.** Number of reads per bar-code (in millions) in the mouse heart libraries using the ligation-based protocol.

|                       | Bar-code 1 | Bar-code 2 | Bar-code 3 | Bar-code 4 * | Bar-code 5 | Bar-code 6 | Bar-code 7 | Bar-code 8 | Bar-code 9 | Bar-code 10 * |
|-----------------------|------------|------------|------------|--------------|------------|------------|------------|------------|------------|---------------|
| Mouse normal hearts   | 1.4        | 1.4        | 0.82       | 0.03         | 1.4        | 0.59       | 1.4        | 0.74       | 0.08       | 0.31          |
| Mouse diseased hearts | 1.3        | 1.2        | 0.80       | 0.42         | 1.3        | 0.77       | 1.2        | 0.74       | 0.09       | 0.001         |

\* - these bar-codes were excluded from further analysis because they exhibit an exceptionally low number of reads in one of the tissues.

**Table S3:** Number of reads per bar-code (in millions) in the human brain library.

| Bar-code 1 | Bar-code 2 | Bar-code 3 | Bar-code 4 | Bar-code 5 | Bar-code 6 * | Bar-code 7 | Bar-code 8 | Bar-code 9 | Bar-code 10 | Bar-code 11 * | Bar-code 12 |
|------------|------------|------------|------------|------------|--------------|------------|------------|------------|-------------|---------------|-------------|
| 0.63       | 0.63       | 0.48       | 0.35       | 0.53       | 0.0023       | 0.30       | 0.43       | 0.65       | 0.64        | 0.18          | 0.41        |

\* - these bar-codes were excluded from further analysis because they exhibit an exceptionally low number of reads.

**Table S4.** Number of reads per bar-code (in millions) in the mouse heart libraries using the PCR-based protocol.

|                 | Bar-code 1                      | Bar-code 2                      | Bar-code 3                      | Bar-code 4                        | Bar-code 5                        | Bar-code 6                        | Bar-code 7                                 | Bar-code 8                                   |
|-----------------|---------------------------------|---------------------------------|---------------------------------|-----------------------------------|-----------------------------------|-----------------------------------|--------------------------------------------|----------------------------------------------|
| Condition       | Mouse normal hearts<br>Sample 1 | Mouse normal hearts<br>Sample 2 | Mouse normal hearts<br>Sample 3 | Mouse diseased hearts<br>Sample 4 | Mouse diseased hearts<br>Sample 5 | Mouse diseased hearts<br>Sample 6 | Mouse normal hearts<br>Pool of Samples 1-3 | Mouse diseased hearts<br>Pool of Samples 4-6 |
| Number of reads | 1.9                             | 1.9                             | 2.6                             | 2.3                               | 2.6                               | 2.1                               | 1.6                                        | 1.9                                          |

**Table S5.** A list of differentially expressed miRNAs between normal and diseased mouse hearts demanding a stringent cutoff of 2-fold change.

| miRNA name   | Fold change comparing normal hearts samples to diseased hearts samples | Fold change comparing normal hearts pool to diseased hearts pool | Higher expression in normal or in diseased mouse hearts |
|--------------|------------------------------------------------------------------------|------------------------------------------------------------------|---------------------------------------------------------|
| mmu-mir-547  | 3.6                                                                    | 4.3                                                              | Higher in diseased                                      |
| mmu-mir-21   | 3.9                                                                    | 3.4                                                              | Higher in diseased                                      |
| mmu-mir-376a | 2.4                                                                    | 2.2                                                              | Higher in diseased                                      |
| mmu-mir-499  | 2.2                                                                    | 2.1                                                              | Higher in normal                                        |
| mmu-mir-185  | 2.0                                                                    | 2.1                                                              | Higher in normal                                        |
| mmu-mir-150  | 2.1                                                                    | 2.0                                                              | Higher in normal                                        |
| mmu-mir-132  | 2.0                                                                    | 2.1                                                              | Higher in diseased                                      |
| mmu-mir-10b  | 2.1                                                                    | 2.0                                                              | Higher in diseased                                      |

## Supplementary Figures

**Figure S1: Possible use of ligation-based bar-coding data.** Same as Figure 1a but comparing counts-number for normal and diseased mouse heart using the same bar-code. As long as the same bar-code is used, one finds that only 20% of the miRNAs are differentially expressed (out of the Poisson noise region). Half of these miRNAs were detected consistently using every bar-code. A similar calculation for different bar-codes but the same biological tissue resulted in an erroneous detection of 10-40% differentially expressed miRNAs due to the bar-code bias.

**Figure S2: Illumina multiplexing kit is incompatible with miRNAs sequencing protocol.** In an attempt to use Illumina indexing kit ([http://www.illumina.com/products/multiplexing\\_sample\\_preparation\\_oligonucleotide\\_kit.ilmn](http://www.illumina.com/products/multiplexing_sample_preparation_oligonucleotide_kit.ilmn)), which introduces bar-codes during the PCR step, we adenylated (rApp) the appropriate compatible primer sequence (Illumina standard paired-ends oligonucleotide), so that it could be used for microRNA capture and sequencing (see Vigneault *et al.*, 2008 for details regarding adenylation and microRNA ligation efficiency assay). Ligation of these oligonucleotides to miRNAs (lane 3) results in poor ligation efficiency and creation of ligation artifacts rendering post-library processing impractical compared to the use of known positive control oligonucleotides such as rApp Illumina v1.5 microRNA adapter (lane 2 – incompatible with multiplexing) as well as rApp IDT miRNA cloning linker-1 (lane 4, <http://www.idtdna.com/catalog/smallRNAcloning/Page1.aspx>). Our own no-bias bar-code PCR compatible oligonucleotide (lane 5 – compatible with multiplexing) was able to ligate properly to miRNA without ligation artifacts.

**Figure S3: The PCR-based protocol for bar-code introduction allows reliable comparison between biological samples.** For each miRNA, the average of the counts in three different samples of normal mouse heart was compared to the counts in a pooled sample. As expected for bias-free bar-codes, 99% of all points fall inside the Poisson noise region.

Figure S1

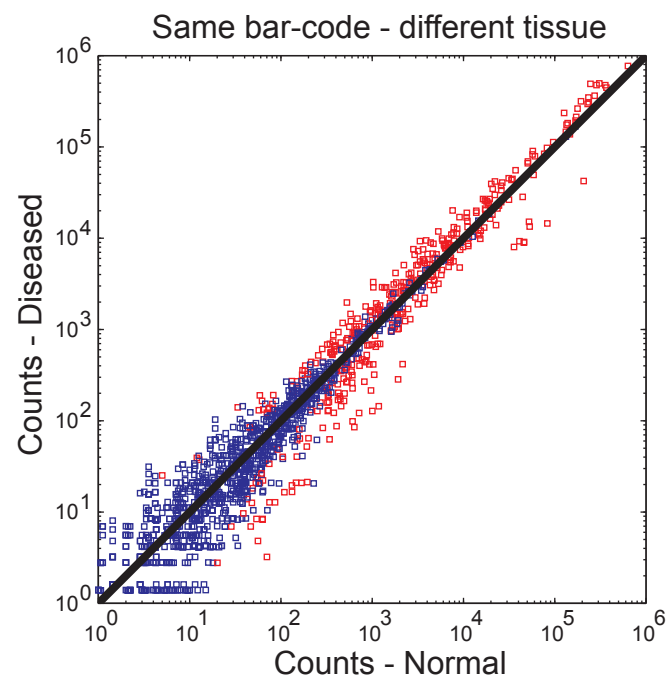

Figure S2

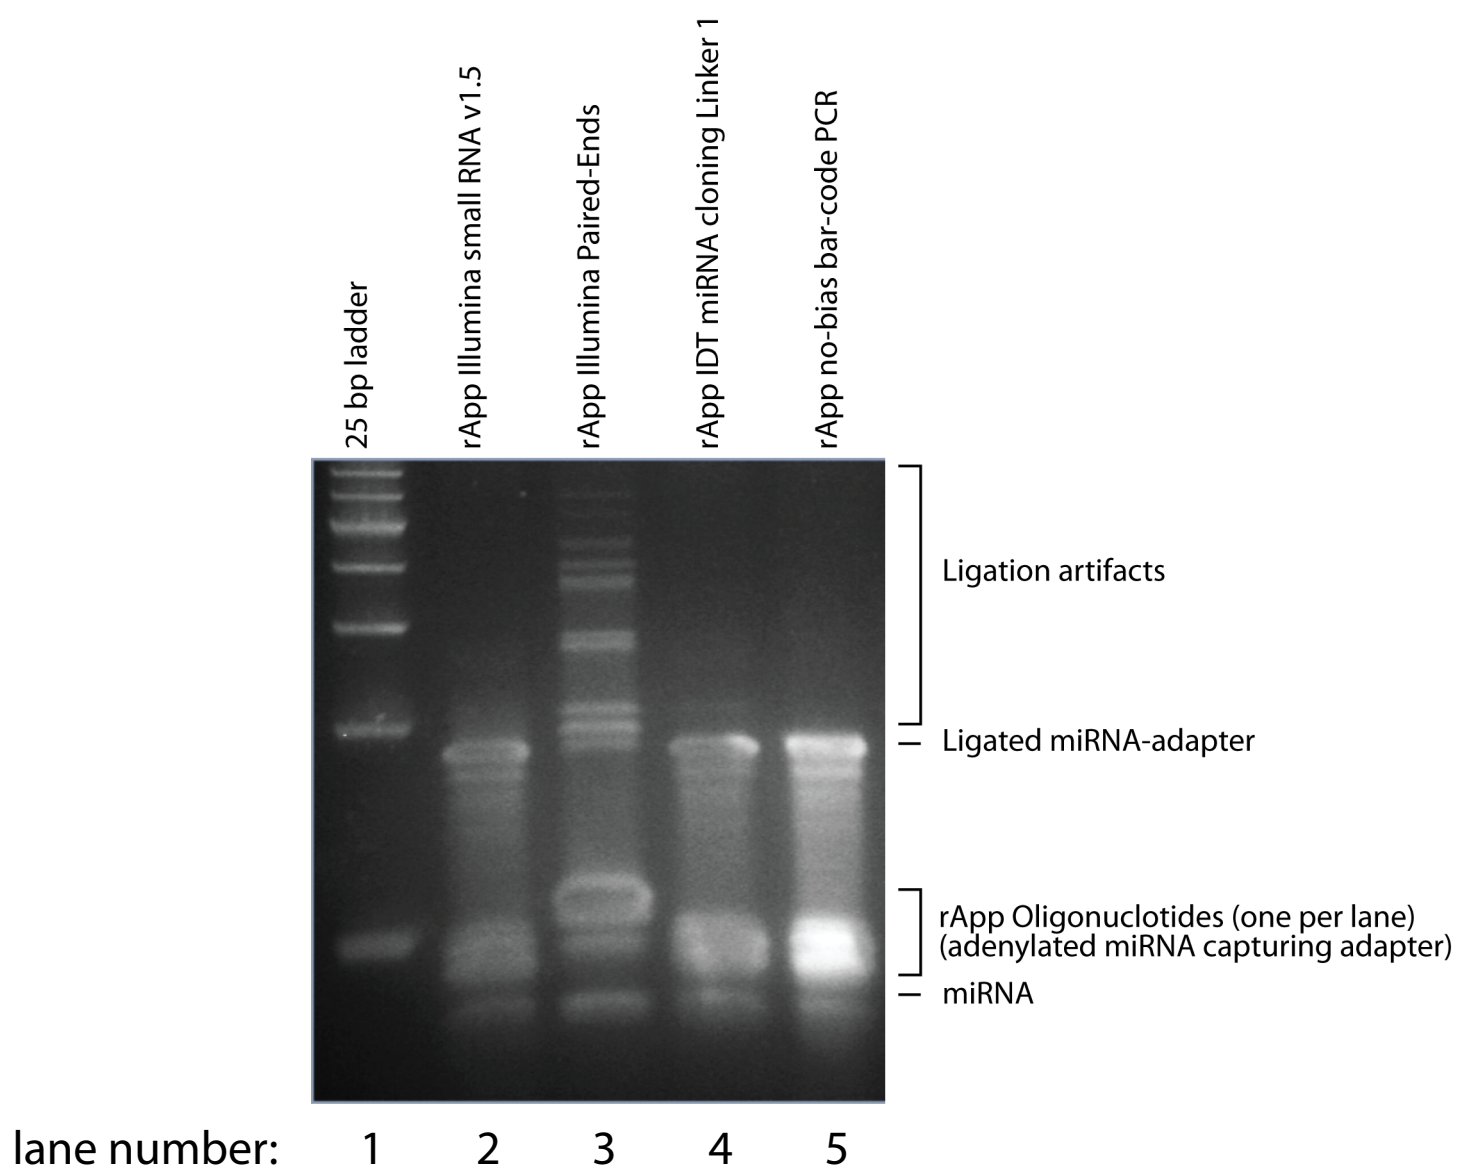

Figure S3

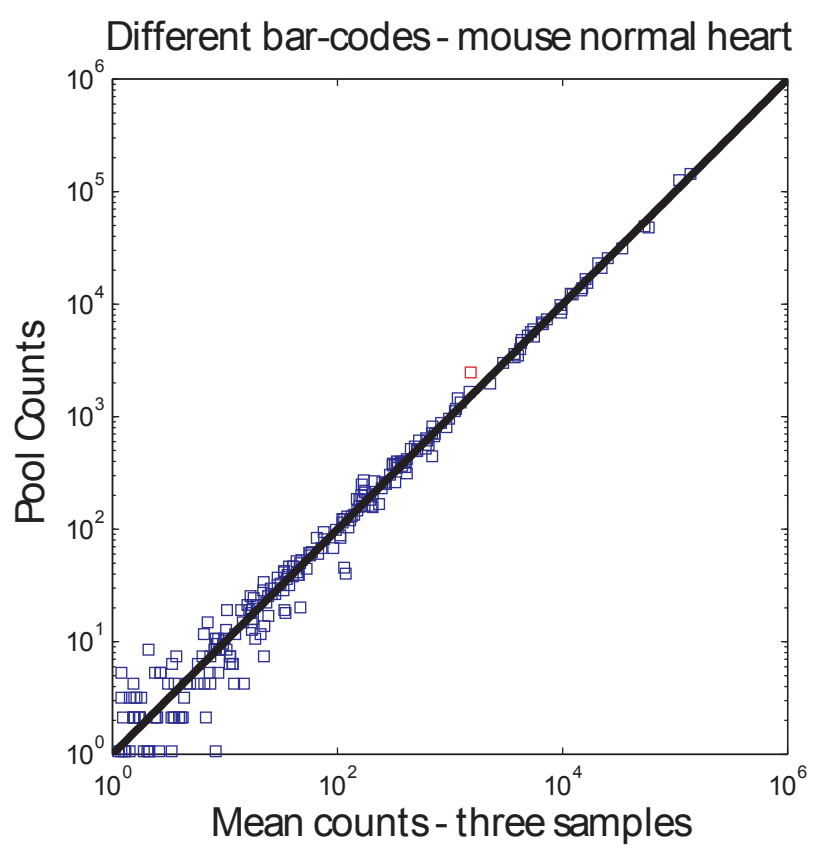

Supplement: Supp_tables_and_figures.pdf [file Supp_tables_and_figures.pdf]
